# Supplementary material
Source: HighWire-hosted journal article supplement (https://tsaco.smart01.highwire.org/content/6/1/e000763)
Supplement: inline-supplementary-material-1 [file inline-supplementary-material-1.pdf]

## APPENDIX A – EFFECT MEASURES

Table A1 – Assessment of effect measures

| Effect measure            | Summarized as                                     | Age category                   | Questionnaire      |
|---------------------------|---------------------------------------------------|--------------------------------|--------------------|
| Health-related QoL        | Index score 0 – 1 (optimal health)                | 0 – 3                          | No questionnaire   |
|                           |                                                   | 4 – 11, and 12 – 17 (if proxy) | EQ-5D-Youth        |
|                           |                                                   | ≥18, and 12-17 (self-complete) | EQ-5D-5L           |
| Disease-specific QoL      | Scale 0 (worst) – 100 (best functional outcome)   | 0 – 3                          | No questionnaire   |
|                           |                                                   | 4 – 17                         | PROMIS UE SF       |
|                           |                                                   | 4 – 17                         | PROMIS Mobility SF |
|                           |                                                   | ≥18                            | QuickDASH          |
|                           |                                                   | ≥18                            | LEFS               |
| Satisfaction w/ treatment | Scale 0 (very dissatisfied) – 10 (very satisfied) | All participants               | Single question    |
| Pain                      | Scale 0 (no pain) – 10 (extremely painful)        | All participants               | Single question    |

Summary scores were calculated using the guideline of each corresponding questionnaire. Normative Dutch values of the EQ-5D-5L were used to calculate the EQ-5D-5L index scores, and normative values of the EQ-5D-3L were used to calculate the EQ-5D-Youth index scores. EQ-5D, EuroQol-5D; LEFS, Lower Extremity Functional Scale; MCID, PROMIS, Patient-Reported Outcomes Measurement Information System; QoL, Quality of Life; QuickDASH, Shortened version of the Disability of the Arm, Shoulder and Hand; Ref., Reference; SD, Standard Deviation; SF, Short Form;
