# Supplementary material
Source: HighWire-hosted journal article supplement (https://tsaco.smart01.highwire.org/content/6/1/e000763)
Supplement: inline-supplementary-material-2 [file inline-supplementary-material-2.pdf]

**APPENDIX B – COST MEASURES****Table B1. Costs per cost unit for primary healthcare, secondary healthcare and absenteeism costs**

| <b>Cost unit</b>                            | <b>Unit</b> | <b>Standard calculation values; EUR</b> |
|---------------------------------------------|-------------|-----------------------------------------|
| <b>Primary healthcare costs</b>             |             |                                         |
| General practitioner visit                  | One unit    | 35.24                                   |
| Physiotherapist visit                       | One unit    | 35.24                                   |
| <b>Secondary healthcare costs</b>           |             |                                         |
| Outpatient / fracture clinic visit          | One unit    | 85.44                                   |
| No show                                     | One unit    | 85.44                                   |
| Emergency Department visit                  | One unit    | 276.61                                  |
| X-ray                                       | One unit    | 53.03                                   |
| CT-scan                                     | One unit    | 133.56                                  |
| <b>Absenteeism costs<sup>a</sup></b>        |             |                                         |
| Work absenteeism – gender specific – male   | Hour        | 40.48                                   |
| Work absenteeism – gender specific – female | Hour        | 33.75                                   |
| Parent absenteeism – average Dutch wage     | Hour        | 37.11                                   |

EUR; Euro expressed in Euros 2019[1, 2]

**Table B2. Costs for immobilization material per type of injury**

| <b>Type of injury</b>                                         | <b>Immobilization costs; EUR</b> |                  |
|---------------------------------------------------------------|----------------------------------|------------------|
|                                                               | <b>Pre-DD-cohort</b>             | <b>DD-cohort</b> |
| Fifth metatarsal base fracture                                | 26.80                            | 51.00            |
| Fifth metacarpal neck fracture                                | 14.63                            | 1.33             |
| Greenstick or torus/buckle type fracture of the distal radius | 14.63                            | 23.83            |
| Radial head- and -neck fracture                               | 9.09                             | 1.29             |
| Mallet finger                                                 | 4.29                             | 2.29             |
| Clavicle fracture                                             | 1.00                             | 0.83             |
| Isolated phalangeal fracture of the foot                      | 0.03                             | 0.03             |
| Fracture of the hallux                                        | 15.65                            | 7.96             |
| Weber A type ankle fracture                                   | 41.38                            | 22.46            |
| Minor avulsion fracture of the ankle                          | 6.30                             | 22.46            |
| Bicycle spoke ankle injury                                    | 7.80                             | 0.46             |

DD; Direct discharge; EUR; Euro expressed in Euros 2019[1, 2]; DD; direct discharge;

**Table B3. Costs per kilometer by means of transport**

| Means of transport      | Unit                | Standard calculation values; EUR |
|-------------------------|---------------------|----------------------------------|
| Car                     | costs per kilometer | 0.20                             |
| Car parking             | costs per visit     | 3.20                             |
| Motorbike / scooter     | costs per kilometer | 0.10                             |
| Bike                    | -                   | 0.00                             |
| Walking                 | -                   | 0.00                             |
| <b>Public transport</b> |                     |                                  |
| Train                   | costs per kilometer | 0.20                             |
| Bus                     | costs per kilometer | 0.20                             |
| Tram                    | costs per kilometer | 0.20                             |

EUR; Euro expressed in Euros 2019[1, 2]

**Table B4. Average travel costs based on means of transport data**

| Means of transport | Number of patients; n | Average costs; EUR                     | Total costs; EUR             |
|--------------------|-----------------------|----------------------------------------|------------------------------|
| Car                | 72                    | 6.00                                   | 432.00                       |
| Motorbike          | 3                     | 1.40                                   | 4.20                         |
| Scooter            | 2                     | 1.40                                   | 2.80                         |
| Train              | 39                    | 2.80                                   | 109.20                       |
| Bus                | 2                     | 2.80                                   | 5.60                         |
| Tram               | 2                     | 2.80                                   | 5.60                         |
| Bike               | 18                    | 0.00                                   | 0.00                         |
| Walking            | 5                     | 0.00                                   | 0.00                         |
| <b>Total</b>       | <b>143</b>            | <b>Sum</b><br><b>Average per visit</b> | <b>559.40</b><br><b>3.91</b> |

EUR; Euro expressed in Euros 2019[1, 2]

The average distance to the nearest hospital in the Netherlands is 7 kilometers, travel distance for one visit was therefore estimated at 14 kilometers (return).[1] Means of transport was based on a previous survey with 143 respondents.

#### References:

1. Hakkaart-Van Roijen L, Van der Linden N, Bouwmans C, et al. Kostenhandleiding: Methodologie van kostenonderzoek en referentieprijzen voor economische evaluaties in de gezondheidszorg. 2015.
2. StatLine. Consumentenprijzen; prijsindex 2015=100 2020 [Available from: <https://opendata.cbs.nl/statline/#/CBS/nl/dataset/83131NED/table?ts=1588863898043>].
